# Amyloid- $\beta$ and APP Deficiencies Cause Severe Cerebrovascular Defects: Important Work for an Old Villain

Salvadore Luna<sup>1,2</sup>, D. Joshua Cameron<sup>1,3</sup>, Douglas W. Ethell<sup>1,2,4\*</sup>

**1** Molecular Neurobiology, Western University of Health Sciences, Pomona, California, United States of America, **2** Graduate College of Biomedical Sciences, Western University of Health Sciences, Pomona, California, United States of America, **3** College of Optometry, Western University of Health Sciences, Pomona, California, United States of America, **4** College of Osteopathic Medicine of the Pacific, Western University of Health Sciences, Pomona, California, United States of America

## Abstract

Alzheimer's disease (AD) is marked by neuritic plaques that contain insoluble deposits of amyloid- $\beta$  (A $\beta$ ), yet the physiological function of this peptide has remained unclear for more than two decades. Using genetics and pharmacology we have established that A $\beta$  plays an important role in regulating capillary bed density within the brain, a function that is distinct from other cleavage products of amyloid precursor protein (APP). APP-deficient zebrafish had fewer cerebrovascular branches and shorter vessels in the hindbrain than wild-type embryos; this phenotype was rescued by treatment with human A $\beta$  peptide, but not a smaller APP fragment called p3. Similar vascular defects were seen in zebrafish treated with a  $\beta$ -secretase inhibitor (BSI) that blocked endogenous A $\beta$  production. BSI-induced vascular defects were also improved by treatment with human A $\beta$ , but not p3. Our results demonstrate a direct correlation between extracellular levels of A $\beta$  and cerebrovascular density in the developing hindbrain. These findings may be relevant to AD etiology where high levels of A $\beta$  in the brain parenchyma precede the development of neuritic plaques and dense aberrantly-branched blood vessel networks that appear between them. The ability of A $\beta$  to modify blood vessels may coordinate capillary density with local metabolic activity, which could explain the evolutionary conservation of this peptide from lobe-finned fish to man.

**Citation:** Luna S, Cameron DJ, Ethell DW (2013) Amyloid- $\beta$  and APP Deficiencies Cause Severe Cerebrovascular Defects: Important Work for an Old Villain. PLoS ONE 8(9): e75052. doi:10.1371/journal.pone.0075052

**Editor:** Jonathan I. Matsui, Pomona College, United States of America

**Received:** May 21, 2013; **Accepted:** August 8, 2013; **Published:** September 5, 2013

**Copyright:** © 2013 Luna et al. This is an open-access article distributed under the terms of the Creative Commons Attribution License, which permits unrestricted use, distribution, and reproduction in any medium, provided the original author and source are credited.

**Funding:** Funding provided by the Molecular Neurobiology Laboratory and Western University of Health Sciences to DJC and DWE, and a grant from the California Institute for Regenerative Medicine to DWE (RN1-00538). The funders had no role in study design, data collection and analysis, decision to publish, or preparation of the manuscript.

**Competing interests:** The authors have declared that no competing interest exist.

\* E-mail: dougeth64@gmail.com

## Introduction

Alzheimer's disease (AD) is the most common cause of dementia in the elderly that currently afflicts more than 5.2 million people in the USA, and 13 million worldwide [1]. A definitive pathological feature of AD is neuritic plaques in affected brain areas, which contain insoluble deposits of amyloid- $\beta$  (A $\beta$ ) peptide. During the early prodromal stages of AD, levels of soluble A $\beta$  rise in the parenchyma of the medial temporal gyrus—years before the appearance of plaques or significant neurodegeneration. Neuritic plaques were first described by Alois Alzheimer [2] more than 100 years ago and A $\beta$  was discovered more than 25 years ago [3], however, the physiological (i.e. non-pathological) function of A $\beta$  remains enigmatic. An understanding of normal A $\beta$  function(s) during development and homeostasis will provide important insights into its role in AD.

A $\beta$  is produced throughout life by the brain, and other tissues, as a product of amyloid precursor protein (APP) proteolysis. Cleavage of APP by  $\beta$ -secretase produces a C99 fragment that is subsequently cleaved by  $\gamma$ -secretase to generate A $\beta$  along with A $\beta$  intercellular domain (AICD; Figure 1). Mutations in APP and subunits of the  $\gamma$ -secretase complex are the most common causes of early-onset AD [4].

The generation of rodent models for AD requires over-expression of human A $\beta$ , as mouse and rat A $\beta$  are less prone to aggregate due to three amino acid substitutions (Figure S1). While these sequence differences are notable as rodents are widely used experimental models, they are an exception to the rule. The amino acid sequence of human A $\beta$  (1–42) is identical to that of most terrestrial vertebrates and lobe-finned coelacanth (Figure S1). Conversely, the amino acid substitutions in mice and rats occur only in the clade *Rodentia*. The high degree of evolutionary conservation, from the

Figure 1.

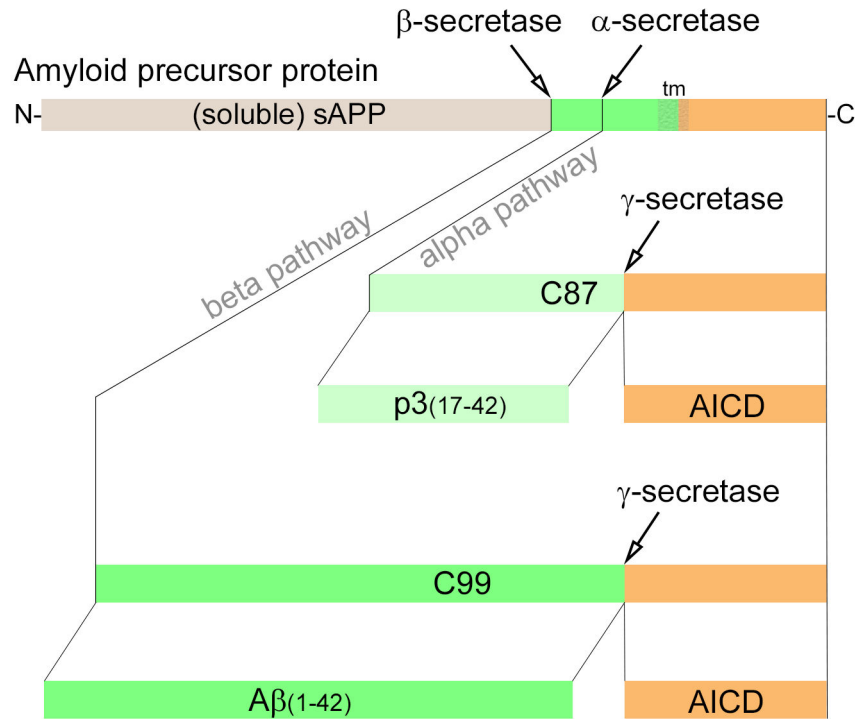

**Figure 1. Schematic of APP processing that produces A $\beta$  and p3 peptides.** APP is initially cleaved by either  $\alpha$ -secretase or  $\beta$ -secretases to yield a C87 in the alpha pathway, or C99 in the beta pathway, respectively. These cleavage events also produce an extracellular soluble APP (sAPP) fragment, from the amino terminus, that is slightly longer with  $\alpha$ -secretase cleavage. The C87 and C99 fragments are subsequently cleaved within the transmembrane domains (tm) by  $\gamma$ -secretase to produce p3 and A $\beta$  peptides, respectively. Both  $\gamma$ -secretase events produce an A $\beta$ -intracellular-domain (AICD) fragment that is entirely cytosolic. Variability of  $\gamma$ -secretase cleavage on C99 produces A $\beta$  fragments from 39–43 amino acids - only A $\beta$ (1–42) is shown – and similar variability with C87 cleavage.

doi: 10.1371/journal.pone.0075052.g001

Devonian period to modern humans, suggests that A $\beta$  plays an indispensable role in survival and reproductive fitness. This function must coincide with physiological aspects of vertebrate development and/or homeostasis as A $\beta$  conservation does trace back to invertebrates.

We recently reported that high levels of A $\beta$  increase cerebrovascular branching during embryonic development of the zebrafish hindbrain [5]. To determine whether lower levels of A $\beta$  would have a reciprocal effect we employed genetic and pharmacological methods to generate APP- and A $\beta$ -deficient zebrafish embryos, and then looked for cerebrovascular defects. We also tested if those defects could be rescued using human A $\beta$  peptide or a shorter cleavage product of APP that corresponds to residues 17–42 of A $\beta$ , called p3 (Figure 1).

## Results

APP-deficient zebrafish (zAPP-MO) were generated by injecting single cell embryos with APP-targeted oligonucleotides (morpholinos) that block the translation of APP mRNA for at least 3 days post-fertilization (dpf) [6]. zAPP-MO embryos had short bodies with large yolk sacs (Figure 2A, B).

In vivo confocal imaging of cerebrovascular structures was made possible by a transgenic zebrafish line that expresses EGFP in vascular endothelial cells [7] (Figure 2A–F, Figure S2). APP-deficient embryos had significantly fewer central artery (CtA) branches off the primordial hindbrain channel (Figure 2C, D) than control embryos (Figure 2A, B) or embryos injected with a scrambled-sequence morpholino (ctrl-MO; Figure 2E–G; Table 1). Further, the mean length of CtA branches in zAPP-MO embryos was significantly shorter than in either control (Figure 2H; Table 2); indeed, the vessels in APP-deficient embryos were ~15% the length of wild-type.

To determine whether vascular abnormalities in zAPP-MO embryos were primarily due to A $\beta$  deficiency we treated them with human A $\beta$  (1–42) starting at 2 dpf, when vascular abnormalities could be discerned in zAPP-MO embryos (Figure S3). A $\beta$  treatment of zAPP-MO embryos significantly increased CtA branching, compared to untreated zAPP-MO embryos at 3 dpf (Figure 3A–C; Table 1). Moreover, mean vessel length was significantly longer in A $\beta$ -treated zAPP-MO, in comparison to untreated zAPP-MO embryos (Figure 3F; Table 2). Rescue of the zAPP-MO vascular phenotype by A $\beta$  peptide was so complete that CtA branch numbers and vessel lengths were

Figure 2.

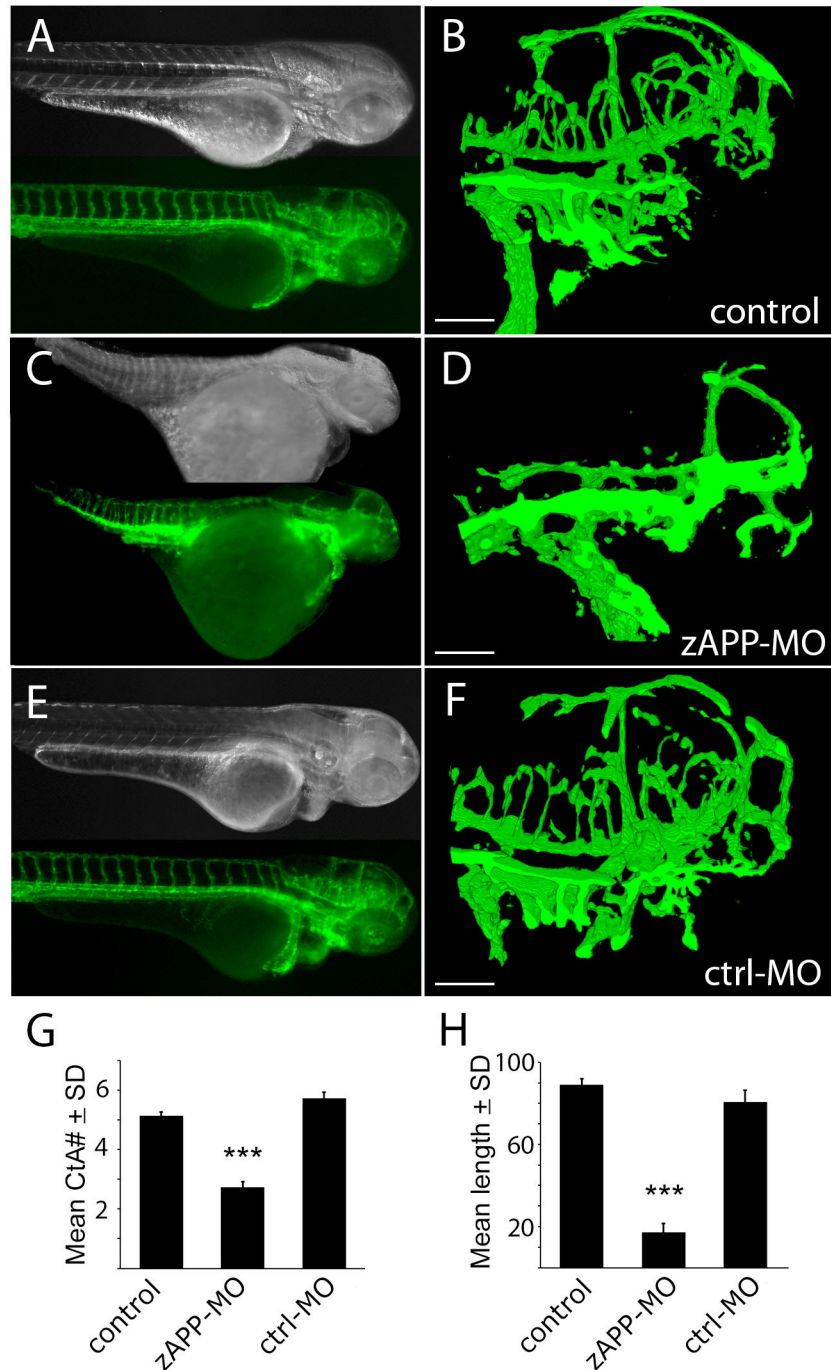

**Figure 2. Cerebrovascular defects in APP-deficient zebrafish embryos.** (A) Dark field (top) and fluorescence (bottom) images of a control transgenic embryo at 3 dpf shows vascular structures due to EGFP expression in endothelial cells. (B) Confocal image (projected stack) of cerebrovascular structures in the head of the fish in A. (C) Dark field (top) and fluorescence (bottom) images of a zAPP-MO embryo at 3 dpf. (D) Confocal image (projected stack) of cerebrovascular structures in the head of the fish in C. (E) Dark field (top) and fluorescence (bottom) images of a ctrl-MO embryo at 3 dpf. (F) Confocal image (projected stack) of cerebrovascular structures in the head of the fish in E. (G) Graph showing the number of CtA branches in control (N = 30), zAPP-MO (N = 15), and ctrl-MO (N = 15) zebrafish at 3 dpf (\*\*\*,  $P < 8.9e-16$ ). (H) Mean CtA branch lengths in control (N = 28), zAPP-MO (N = 14), and ctrl-MO (N = 8) embryos at 3 dpf (\*\*\*,  $P < 9.8e-23$ ); scale bars = 100  $\mu$ m.

doi: 10.1371/journal.pone.0075052.g002

**Table 1.** Mean CtA branch numbers of 3 dpf zebrafish embryos in all conditions examined.

| condition         | N  | mean | SEM  | p value  |
|-------------------|----|------|------|----------|
| zAPP-MO           | 15 | 2.73 | 0.20 | 8.93E-16 |
| zAPP-MO+A $\beta$ | 15 | 5.27 | 0.20 | 1        |
| zAPPMO+P3         | 15 | 2.93 | 0.20 | 8.78E-14 |
| BSI               | 29 | 4.24 | 0.14 | 0.000602 |
| BSI+A $\beta$     | 8  | 4.88 | 0.27 | 1        |
| BSI+P3            | 10 | 3.40 | 0.25 | 3.02E-07 |
| Control           | 30 | 5.13 | 0.14 | NA       |
| Ctrl-MO           | 15 | 5.73 | 0.20 | 0.445238 |

P values were calculated by ANOVA with Bonferroni correction.

**Table 2.** Mean CtA branch length of 3 dpf zebrafish embryos in all conditions examined.

| condition         | N  | mean  | SEM  | p value |
|-------------------|----|-------|------|---------|
| zAPP-MO           | 14 | 17.20 | 4.42 | 1E-22   |
| zAPP-MO+A $\beta$ | 10 | 87.04 | 5.23 | 1       |
| zAPPMO+P3         | 14 | 34.62 | 4.42 | 1E-15   |
| BSI               | 21 | 46.07 | 3.61 | 3E-13   |
| BSI+A $\beta$     | 8  | 74.02 | 5.85 | 0.7282  |
| BSI+P3            | 10 | 34.42 | 5.23 | 4E-13   |
| Control           | 28 | 88.99 | 3.12 | NA      |
| Ctrl-MO           | 8  | 80.68 | 5.85 | 1       |

P values were calculated by ANOVA with Bonferroni correction.

not significantly different from uninjected control or ctrl-MO embryos (Figure 3E, F; Tables 1, 2). These findings establish that APP-deficiency reduces vascular branching and vessel length due to low levels of A $\beta$ .

A $\beta$  is a product of serial  $\beta$ - and  $\gamma$ -secretase cleavage of APP that generates 39-43 residue peptides in the “beta pathway”. By contrast, p3 is the result of serial  $\alpha$ - and  $\gamma$ -secretase cleavage of APP to produce 23-27 residue peptides in the “alpha pathway” (Figure 1). The p3 peptide corresponds to residues 17-42 at the carboxyl end of human A $\beta$ . While the vascular phenotype of zAPP-MO embryos was rescued by exogenous A $\beta$  treatment, p3 peptide treatment had no significant effects on CtA branching or vessel length in zAPP-MO embryos (Figure 3D–F). This difference in the abilities of A $\beta$  but not p3 to rescue vascular defects in APP-deficient embryos establishes that residues 1-16 are critical for the vascular activity of A $\beta$ .

APP-deficient zebrafish embryos (zAPP-MO) lack full-length APP and all of its cleavage products, including A $\beta$ , p3, soluble-APP and AICD (Figure 1). To provide conclusive evidence that the vascular defects in zAPP-MO embryos were due to low levels of A $\beta$  we generated A $\beta$ -deficient embryos using  $\beta$ -secretase inhibitor (BSI) to block endogenous production of the peptide. BSI-treated embryos had significantly fewer CtA branches than untreated control embryos (Figure 4A, B, E; Table 1). Vessel length in BSI-treated embryos was also shorter than in untreated controls (Figure 4F; Table 2).

Interestingly, gross morphological aberrations in BSI-treated embryos were not as severe as with zAPP-MO embryos, in that they did not have a shortened body and their large yolk sacs were only slightly misshapen. This observation is consistent with non-vascular defects being caused by the loss of full-length APP or other cleavage product in zAPP-MO embryos.

To rescue the vascular defects in BSI-treated embryos we administered human A $\beta$  starting at 2 dpf. A $\beta$  treatment significantly increased CtA branch number, compared to embryos treated with BSI alone (Figure 4). Moreover, vessel length in BSI-treated embryos was also significantly longer in embryos that were also treated with A $\beta$  (Figure 4F; Table 2). Importantly, p3 peptide did not rescue vascular defects in BSI-treated embryos (Figure 4B–F; Tables 1 & 2).

## Discussion

Through genetic and pharmacological manipulations we have established that A $\beta$  deficiency reduces cerebrovascular branching and vessel length in embryonic zebrafish hindbrain. These findings support a physiological role for A $\beta$  in capillary bed density and remodeling that has been conserved for most of vertebrate evolution. Taken together with findings from a previous report [5], these results demonstrate that  $\beta$ -secretase and  $\gamma$ -secretase inhibitors have complementary effects on cerebrovascular branching. Inhibiting either secretase will prevent A $\beta$  production but there are side-effects with GSI's due to other substrates that rely on  $\gamma$ -secretase for processing, including Notch, which explains why BSI and GSI have reciprocal effects on blood vessel branching even though they both inhibit A $\beta$  production. Gamma-secretase inhibitors and elevated levels of soluble A $\beta$  increase blood vessel branching in the embryonic zebrafish hindbrain [5]; however, APP-deficiency and BSI (A $\beta$ -deficiency) reduced blood vessel branching and decreased vessel length. Remarkably, vascular defects in APP- and A $\beta$ -deficient embryos were rescued by human A $\beta$ . Although A $\beta$  in zebrafish, and other *Teleosts*, varies from A $\beta$  in most vertebrates, including man, its function remains consistent (Figure S1). Human A $\beta$  is able to reverse vascular defects caused by the loss of endogenous APP and A $\beta$  in zebrafish. This observation suggests that the coelacanth-to-human sequence of A $\beta$  is at least as potent for this vascular function as zebrafish A $\beta$ , and may represent the optimal form of A $\beta$ . As a regulator of blood vessel branching and length A $\beta$  plays a key role in regulating local capillary density. For example, we recently showed that human A $\beta$  can increase capillary bed density in adult zebrafish retina [8]. Although A $\beta$  availability affects vascular length and branching, neither higher nor lower levels significantly impacted overall embryo length (Figure S4).

The idea that A $\beta$  availability impacts capillary density provides a new perspective of A $\beta$  biology that is directly relevant to AD etiology. For example, the side-effects in recent clinical trials that targeted A $\beta$  production to treat AD could be the result of interfering with this function [9–12]. Gamma-secretase inhibitor (GSI) trials were halted due to adverse effects [13] that included vasogenic edema [14], liver damage, and worst of all an exacerbation of AD progression [15]. Those

Figure 3.

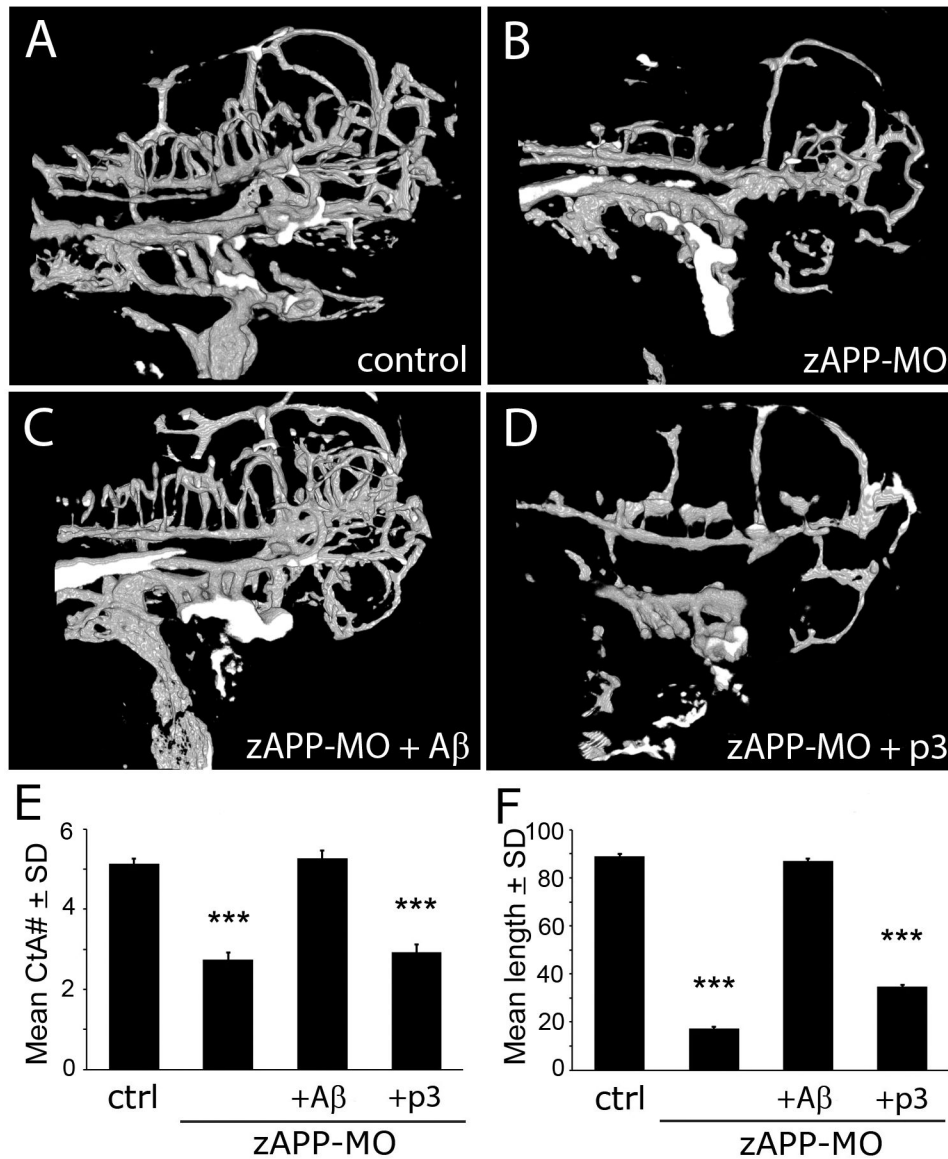

**Figure 3. A $\beta$  rescued vascular defects in APP-deficient (zAPP-MO) zebrafish embryos at 3 dpf.** (A) Confocal image (projected stack) of a control zebrafish embryo at 3 dpf. (B) Comparable image of a zAPP-MO embryo at 3 dpf. (C) Cerebrovascular structures of an A $\beta$ -treated zAPP-MO were similar to non-injected controls. (D) p3 treatment did not rescue vascular defects in zAPP-MO embryos. (E) Graph of CtA branch numbers in embryos in the control (N = 30), zAPP-MO (N = 15), A $\beta$ -treated zAPP-MO (N = 15), and p3-treated zAPP-MO (N = 15) embryos at 3 dpf. Differences between control and zAPP-MO were significant ( $P < 8.9e-16$ ), but there were no significant differences between A $\beta$ -treated zAPP-MO and control or ctrl-MO. p3-treated zAPP-MO had significantly fewer branches than control embryos ( $P < 8.7e-14$ ). (F) Graph of mean CtA branch lengths in control (N = 28), zAPP-MO (N = 14), A $\beta$ -treated zAPP-MO (N = 10), and p3-treated zAPP-MO (N = 10) embryos at 3 dpf. Differences between control and zAPP-MO were significant ( $P < 9.8e-23$ ), but there were no significant differences between A $\beta$ -treated zAPP-MO and control or ctrl-MO. p3-treated zAPP-MO had significantly shorter vessel lengths than control embryos ( $P < 1.3e-15$ ).

doi: 10.1371/journal.pone.0075052.g003

adverse effects were attributed to the disruption of processes that rely on other  $\gamma$ -secretase substrates, such as Notch [16,17]. Notch is a major regulator of vascular stability and

inhibitors of Notch signaling induce hyper-vascularization that remarkably similar to the dense aberrant blood vessel networks that form between A $\beta$ -containing plaques [18]. Therefore, trials

Figure 4.

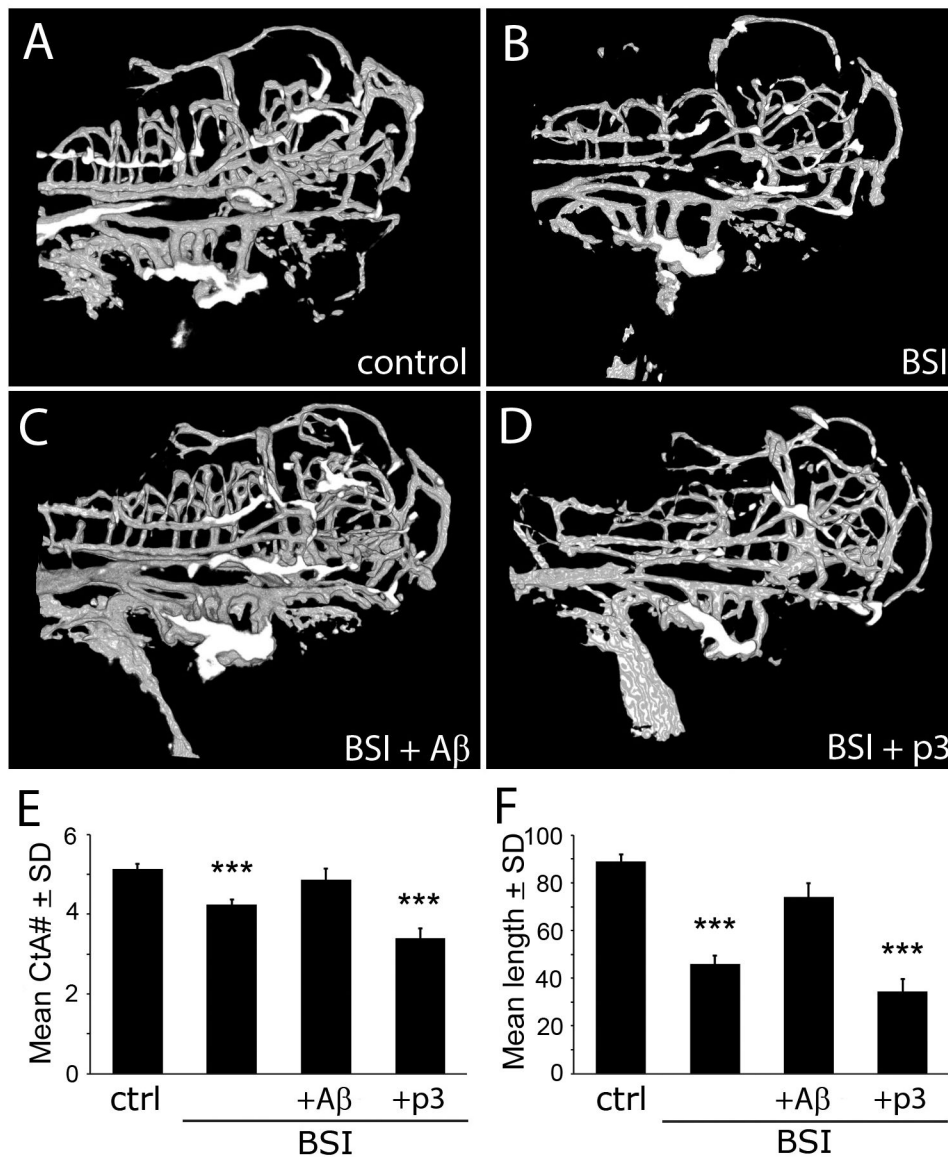

**Figure 4. A $\beta$ -deficiency induced by BSI-treatment caused vascular defects that were rescued by A $\beta$ , but not p3.** (A) Confocal image of cerebrovascular structures in an untreated control zebrafish at 3 dpf (control). (B) Vascular structures in a BSI-treated embryo at 3 dpf (BSI). (C) Cerebrovascular structures in a BSI-treated embryo that was treated with A $\beta$  (BSI+A $\beta$ ) showed rescue of the vascular defects. (D) Vascular defects in a BSI-treated embryo were not rescued by p3 (BSI+p3). (E) Graph of CtA branch numbers in control (N = 30), BSI (N = 29), BSI+A $\beta$  (N = 8), and A $\beta$ +p3 (N = 10) embryos at 3 dpf. Differences between control and BSI were significant ( $P < 0.0006$ ), but there was no significant difference between BSI+A $\beta$  and control embryos. BSI+p3 embryos had significantly fewer branches than control embryos ( $P < 3.0e-7$ ). (F) Graph of mean CtA branch lengths in control (N = 28), BSI (N = 21), BSI+A $\beta$  (N = 8), and BSI+p3 (N = 10) embryos at 3 dpf. Differences between control and BSI were significant ( $P < 3.0e-13$ ), but there was no significant difference between BSI+A $\beta$  and control embryos. BSI+p3 embryos had significantly shorter vessel lengths than control embryos ( $P < 3.6e-13$ ).

doi: 10.1371/journal.pone.0075052.g004

that attempt to block A $\beta$  production with GSI's trade the modest Notch blocking effects of A $\beta$  for the more efficient Notch

blocking effects of GSI, which accelerates neovascular changes that include in all brain regions [5,19].

If a major physiological function of A $\beta$  is to increase capillary bed density and high levels of A $\beta$  cause hyper-vascularization in AD, then BSI's should reduce endogenous levels of A $\beta$  and mitigate its effects on aberrant blood vessel formation—without the disastrous side-effects of GSI's. These findings are particularly relevant as BSI clinical trials are currently underway. BSI's hold promise as a therapeutic approach to AD, though it may be prudent to watch for high-dose effects on vascular pruning in brain areas not affected by AD pathology, and highly vascularized tissues such as lung and kidney.

## Materials and Methods

Tg (kdr:EGPF) s843 transgenic zebrafish, expressing GFP in vascular endothelial cells, were obtained from the Zebrafish International Resource Center/ZIRC (Eugene, OR), and maintained under standard conditions at 28.5°C on a 10 h dark -14 h light cycle [7,20]. Embryos were staged in hours post-fertilization (hpf) and days post-fertilization (dpf) based on morphological features. Embryos were raised in E3 buffer (5 mM NaCl, 0.17 mM KCl, 0.33 mM CaCl<sub>2</sub>, 0.33 mM MgSO<sub>4</sub>) at 28.5°C. Human A $\beta$ 1-42 was purchased from Biomer and prepared as previously described [21]. Human p3 corresponding to peptides 17-42 of A $\beta$  was purchased from Anaspec, and prepared in the same way as A $\beta$ .

## Ethics Statement

All animal husbandry and experiments were approved and conducted in strict accordance with recommendations in the Guide for the Care and Use of Laboratory Animals of the National Institutes of Health. The protocol was approved by the Western University of Health Sciences Institutional Animal Care and Use Committee.

## Embryo Treatments

Zebrafish were dechorionated at 24 hpf prior to treatment. Treatment solutions were diluted in E3 buffer containing 0.003% 1-phenyl-2-thio-Urea (PTU) to inhibit pigment development. Treatments consisted of 25  $\mu$ g/mL monomeric A $\beta$ 1-42, 25  $\mu$ g/mL p3, 20  $\mu$ g/mL BSI, or E3 buffer for a negative control. Embryos remained in treatment conditions until 3 dpf when they were fixed in 4% paraformaldehyde/PBS overnight.

## Morpholino injections of embryos

Fertilized zebrafish embryos were collected and microinjected with ~4 nl of zAPP-MO morpholino at the single cell stage (<45 minutes post-fertilization), using a dissecting microscope and Drummond Nanoject II. Phenol red was included in the solution to monitor the injections.

## Zebrafish imaging

Eyes were removed from the fixed embryos by grazing the membrane with a tungsten needle. Zebrafish embryos were laid on their sides and mounted on coverglass using a solution of methylcellulose. Imaging was done with a Nikon C1 3-color confocal microscope using 10X or 20X objectives. Confocal

slices were captured from the lateral surface of the head to midline. Image stacks were then converted to 8-bit, Gaussian smoothed, binarized to establish a threshold, and skeletonized to obtain centerlines for each path/branch. 3D renderings were created to obtain rotational volume images, movies, and for vascular data analysis [22]. Hindbrain vascular branch length was measured with the segmentation simple neurite tracer plugin in Fiji distribution of ImageJ to determine the dorsal distance traveled of the central arterial branches (CtA) from the posterior hindbrain channel (PHBC) bounded by the anterior medial cerebral vein (MCeV) and the posterior cerebral vein (PCeV). Branching of central arteries (CtA) emerging from the PHBC, which project to basilar artery, was done as previously described [5].

## Statistical analysis

Statistical comparisons between treatment groups were evaluated by one-way ANOVA with Bonferroni's post-hoc test (Table 1). Data presented in all histograms represent mean and standard error of the mean, as detailed in Tables 1 and 2.

## Supporting Information

**Figure S1. Evolutionary alignment of A $\beta$ 1-42 from humans to cartilaginous fishes.** Text without background color indicates perfect conservation of the residue with human and coelacanth A $\beta$ . Evolutionary times are not scaled. (TIF)

**Figure S2. Movie of cerebrovascular structures in 3 dpf zebrafish.** 3D rendering of cerebrovascular structures in a 3 dpf zebrafish embryo with labels, generated from confocal imaging of EGFP fluorescence in vascular endothelial cells. Rotation of the rendering shows 3D relationships of cerebrovascular structures in the head on the left side of the fish. Transition to pseudocolor shows vessel diameter differences; compare gills at the bottom to CtA in the hindbrain. The next transition shows a skeletonized rendering of blood vessels. CtA vessels are highlighted with purple. (MOV)

**Figure S3. Vascular abnormalities in zAPP-MO could be discerned in embryos at 2 dpf.** Fluorescence (top) and confocal (bottom) microscopy of 2 dpf embryos. (A) control uninjected embryo. (B) Embryo injected with scrambled sequence morpholino oligonucleotides (ctrl-MO). (C) Embryo injected with zAPP-targeting morpholino. Note CtA emerging from the lateral PHBC on the left side of A and B, but not C. (TIF)

**Figure S4. Effects of A $\beta$  availability on embryo size at 4 dpf.** Histogram showing total length of embryos treated under control condition, and in E3 water containing A $\beta$  (5, 15, or 25  $\mu$ g/ml). BSI (20  $\mu$ g/mL), or GSI (10  $\mu$ g/mL). (TIF)

## Acknowledgements

We thank Michel Baudry and Steve Henriksen for feedback on the manuscript.

## Author Contributions

Conceived and designed the experiments: DWE. Performed the experiments: SL. Analyzed the data: SL DJC. Contributed reagents/materials/analysis tools: DJC. Wrote the manuscript: DWE.

## References

1. Theis W, Blieler L (2013) Alzheimer's Association report: 2013 Alzheimer's disease facts and figures. *Alz Dement* 9: 208-245. doi: 10.1016/j.jalz.2013.02.003.
2. Alzheimer A (1907) Uber eine eigenartige Erkrankung der Hirnrinde. *Allg Z Psychiat Psych-Gericht Med* 64: 146-148.
3. Goate A, Hardy J (2012) Twenty years of Alzheimer's disease-causing mutations. *J Neurochem* 120(Suppl 1): 3-8. doi:10.1111/j.1471-4159.2011.07575.x. PubMed: 22122678.
4. O'Brien RJ, Wong PC (2011) Amyloid precursor protein processing and Alzheimer's disease. *Annu Rev Neurosci* 34: 185-204. doi:10.1146/annurev-neuro-061010-113613. PubMed: 21456963.
5. Cameron DJ, Galvin C, Alkam T, Sidhu H, Ellison J et al. (2012) Alzheimer's-related peptide amyloid- $\beta$  plays a conserved role in angiogenesis. *PLOS ONE* 7: e39598. doi:10.1371/journal.pone.0039598. PubMed: 22792182.
6. Joshi P, Liang JO, DiMonte K, Sullivan J, Pimplikar SW (2009) Amyloid precursor protein is required for convergent-extension movements during zebrafish development. *Dev Biol* 335(1): 1-11. doi:10.1016/j.ydbio.2009.07.041. PubMed: 19664615.
7. Higashijima S, Okamoto H, Ueno N, Hotta Y, Eguchi G (1997) High-frequency generation of transgenic zebrafish which reliably express GFP in whole muscles or the whole body by using promoters of zebrafish origin. *Dev Biol* 192: 289-299. doi:10.1006/dbio.1997.8779. PubMed: 9441668.
8. Cunvong K, Huffmire D, Ethell DW, Cameron DJ (2013) Amyloid- $\beta$  increases capillary bed density in a zebrafish model of macular degeneration. *Investigative Ophthalmology and Visual Science* doi: pii. 1-10821v 10.1167/iops.12-10821.
9. Tong G, Wang JS, Sverdlow O, Huang SP, Slemmon R et al. (2012) Multicenter, randomized, double-blind, placebo-controlled, single ascending dose study of the oral  $\gamma$ -secretase inhibitor BMS-708163 (Avagacestat): tolerability profile, pharmacokinetic parameters, and pharmacodynamic markers. *Clin Ther* 34: 654-667. doi:10.1016/j.clinthera.2012.01.022. PubMed: 22381714.
10. Coburn CA, Stachel SJ, Li YM, Rush DM, Steele TG et al. (2004) Identification of a small molecule non-peptide active site beta-secretase inhibitor that displays a nontraditional binding mode for aspartyl proteases. *J Med Chem* 47: 6117-6119. doi:10.1021/jm049388p. PubMed: 15566281.
11. Ghosh AK, Kumaragurubaran N, Hong L, Kulkarni SS, Xu X et al. (2007) Design, synthesis, and X-ray structure of potent memapsin 2 (beta-secretase) inhibitors with isophthalamide derivatives as P2-P3-ligands. *J Med Chem* 50: 2399-2407. doi:10.1021/jm061338s. PubMed: 17432843.
12. Siemers ER, Quinn JF, Kaye J, Farlow MR, Porsteinsson A et al. (2007) Effects of a gamma-secretase inhibitor in a randomized study of patients with Alzheimer's disease. *Neurology* 66: 602-604. doi: 10.1212/01.WNL.0000198762.41312.E1. PubMed: 16505324.
13. Hopkins CR (2011) ACS Chemical Neuroscience Molecule Spotlight on ELND006: Another  $\gamma$ -secretase inhibitor fails in the Clinic. *ACS Chem Neurosci* 2: 279-280. doi:10.1021/cn2000469. PubMed: 22778871.
14. Carlson C (2011) Prevalence of asymptomatic vasogenic edema in pretreatment Alzheimer's disease study cohort from phase 3 trials of semagacestat and solanezumab. *Alzheimers Dement* 7: 396-401. doi: 10.1016/j.jalz.2011.05.1144. PubMed: 21784350.
15. Exance A (2011) Alzheimer's failure raises questions about disease-modifying strategies. *Nat Rev Drug Discov* 9: 749-751.
16. Schor NF (2011) What the halted phase III  $\gamma$ -secretase inhibitor trial may (or may not) be telling us. *Ann Neurol* 69: 237-239. doi:10.1002/ana.22365. PubMed: 21387368.
17. Crump CJ (2012) BMS-708163 targets Presenilin and lacks Notch-sparing activity. *Biochemistry* 51: 7209-7211. doi:10.1021/bi301137h. PubMed: 22931393.
18. Meyer EP, Ulmann-Schuler A, Staufenbiel M, Krucker T (2008) Altered morphology and 3D architecture of brain vasculature in a mouse model for Alzheimer's disease. *Proc Natl Acad Sci U S A* 105(9): 3587-3592. doi:10.1073/pnas.0709788105. PubMed: 18305170.
19. Ethell DW (2010) An amyloid-notch hypothesis for Alzheimer's disease. *Neuroscientist* 16: 614-617. doi:10.1177/1073858410366162. PubMed: 20592273.
20. Westerfield M (2007) *The Zebrafish Book*. University of Oregon Press.
21. Ethell DW, Kinloch R, Green DR (2002) Metalloproteinase shedding of Fas ligand regulates beta-amyloid neurotoxicity. *Curr Biol* 12(18): 1595-1600. doi:10.1016/S0960-9822(02)01140-5. PubMed: 12372252.
22. Schindelin J, Arganda-Carreras I, Frise E, Kaynig V, Longair M et al. (2012) Fiji: an open-source platform for biological image analysis. *Nat Methods* 9(7): 676-682. doi:10.1038/nmeth.2019. PubMed: 22743772.
